# Supplementary material for: A responsive porous hydrogel particle-based delivery system for oncotherapy
Source: Royal Society of Chemistry journal article supplement (doi:10.1039/c8nr09990a), 2019-01-01
Supplement: c8nr09990a1.pdf [file c8nr09990a1.pdf]

Supporting Information

**Responsive porous hydrogel particles-based delivery system for  
oncotherapy**

Yuanyuan Wen,<sup>a,b,†</sup> Yuxiao Liu,<sup>c,†</sup> Han Zhang,<sup>c</sup> Minhan Zou,<sup>c</sup> Dan Yan,<sup>a\*</sup>

Dingding Chen,<sup>b\*</sup> and Yuanjin Zhao<sup>a,c\*</sup>

<sup>a</sup> Department of Pharmacy, Jiangsu Cancer Hospital & Jiangsu Institute of Cancer  
Research & The Affiliated Cancer Hospital of Nanjing Medical University, Nanjing  
210009, China.

<sup>b</sup> Department of Clinical Pharmacy, School of Basic Medicine and Clinical Pharmacy,  
China Pharmaceutical University, Nanjing 211198, China.

<sup>c</sup> State Key Laboratory of Bioelectronics, School of Biological Science and Medical  
Engineering, Southeast University, Nanjing, 210096, China.

† These authors contributed equally to this work.

Email: [yandan1980@njmu.edu.cn](mailto:yandan1980@njmu.edu.cn) (D.Y.); [chdd@cpu.edu.cn](mailto:chdd@cpu.edu.cn) (D.D.C.) ;

[yjzhao@seu.edu.cn](mailto:yjzhao@seu.edu.cn) (Y.J.Z.)

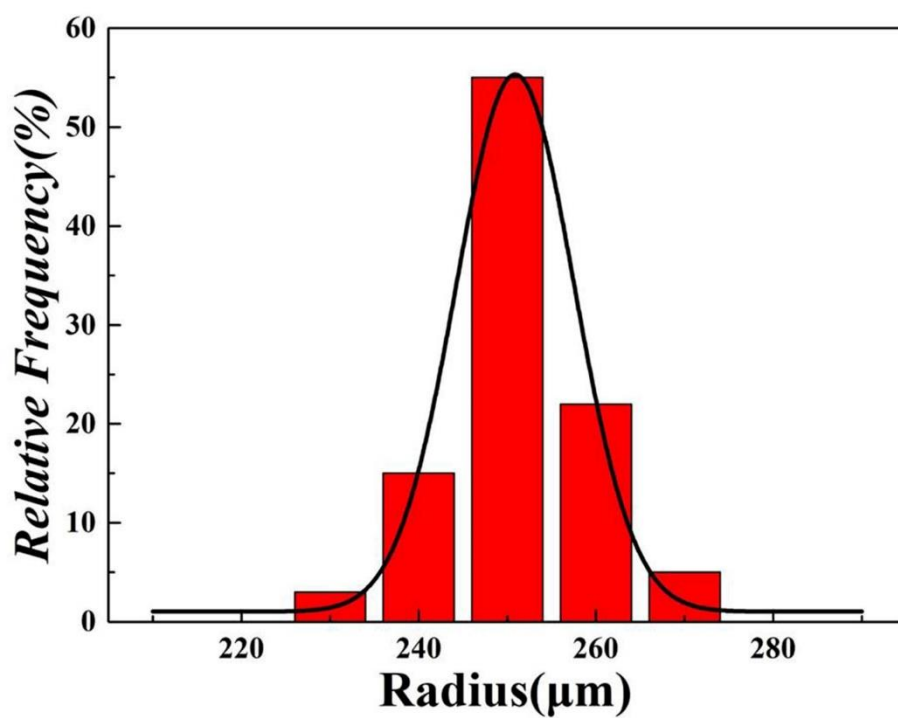

**Fig. S1** The statistical size distribution histogram of the SCCBs. The coefficient of variation (CV) was calculated to be 4.89%.

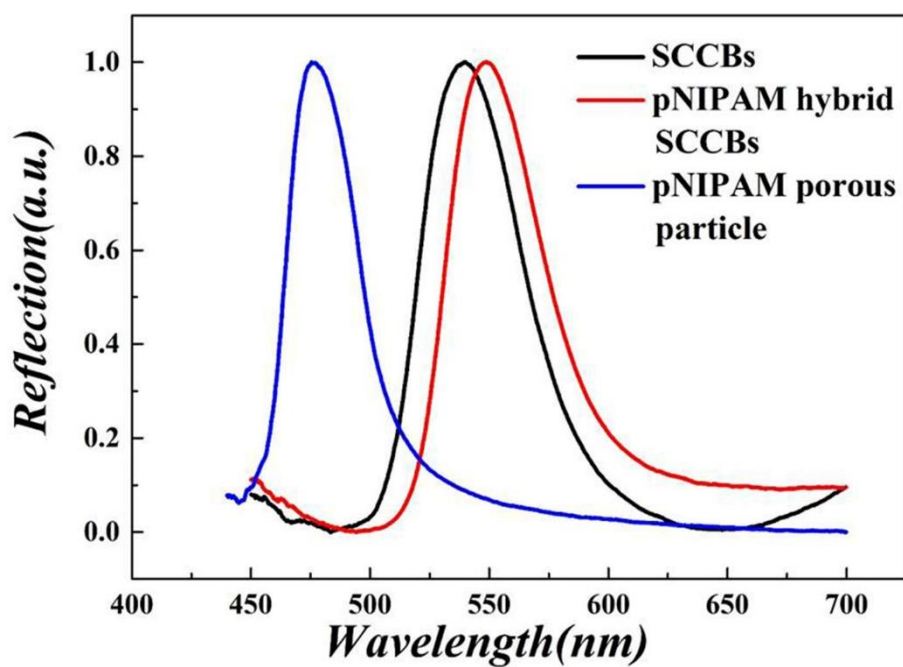

**Fig. S2** The reflection spectra of template SCCBs, pNIPAM hybrid SCCBs and pNIPAM porous particles.

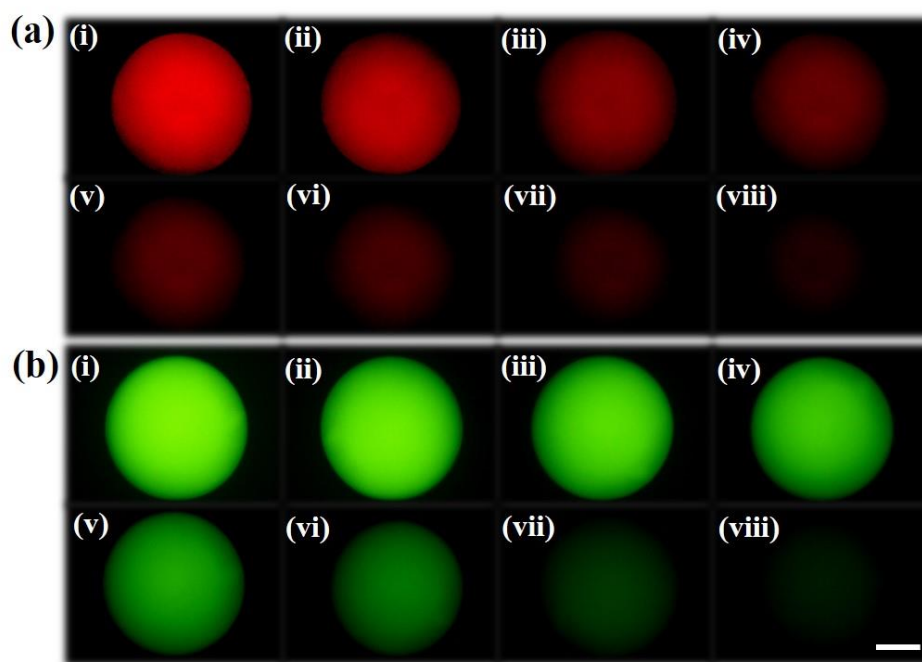

**Fig. S3** The fluorescent images of particles loaded with rhodamine b (a) and FITC (b) after drug releasing for 0 day ( i ), 1 day ( ii ), 2 days ( iii ), 3 days ( iv ), 4 days ( v ), 5 days ( vi ), 6 days (vii) and 7 days (viii). (Because metformin and 5-fluorouracil have no fluorescent, they were replaced by rhodamine b and FITC, respectively.) The scale bar is 100  $\mu\text{m}$ .

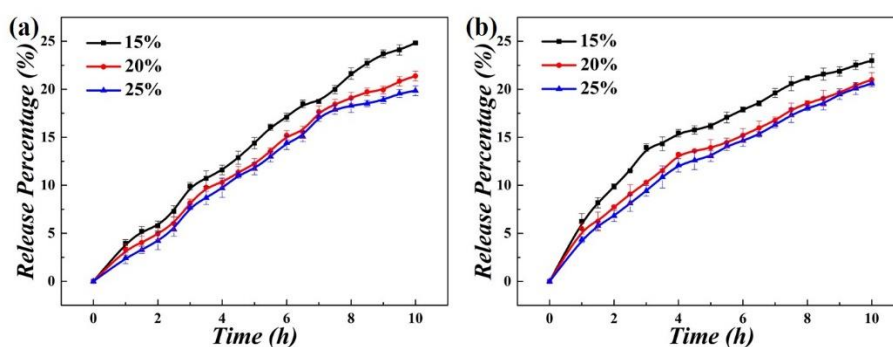

**Fig. S4** The releasing curves of metformin (a) and 5-fluorouracil (b) at the room temperature during 10 hours.

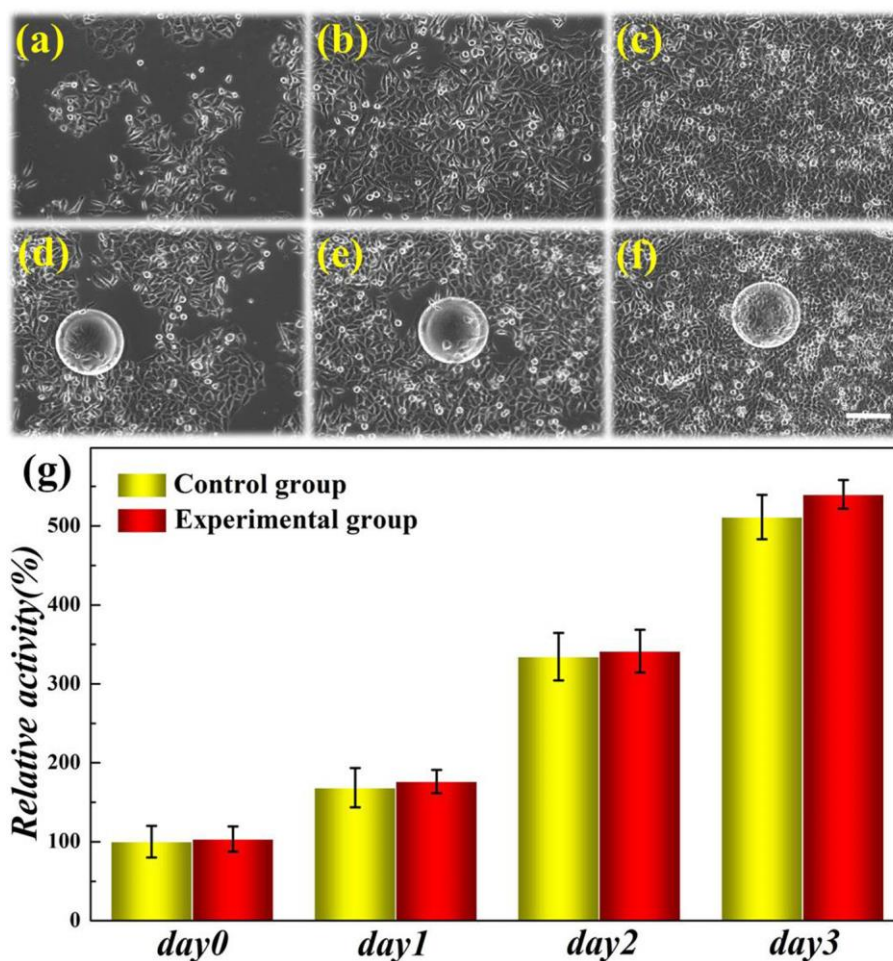

**Fig. S5** (a-c) The images of HepG2 cells cultured after different time points (1, 2 and 3 day) respectively. (d-f) The images of HepG2 cells cultured with pNIPAM hydrogel particles after different time points (1, 2 and 3 day) respectively. The scale bar is 200  $\mu\text{m}$ . (g) The MTT results of the cells cultured in different groups.

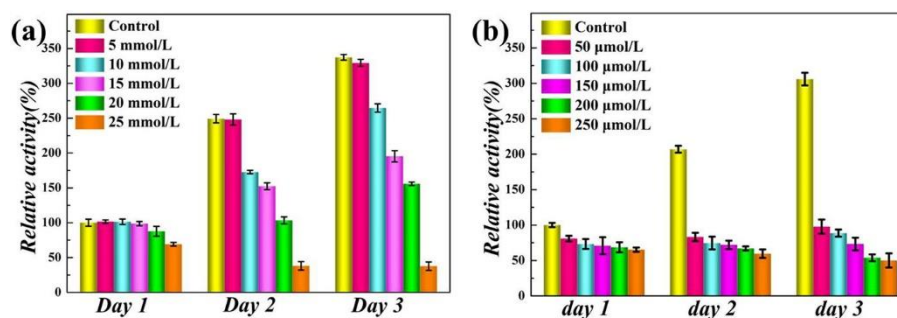

**Fig. S6** (a) The MTT results of different concentrations of metformin on HepG2 cells;

(b) The MTT results of different concentrations of 5-fluorouracil on HepG2 cells.
